# Supplementary material
Source: publisher figshare collection journal article supplement (https://frontiersin.figshare.com/ndownloader/files/20016137)
Supplement: Supplementary file 1 [file 20016137]

**MONTREAL COGNITIVE ASSESSMENT (MOCA) TOOL**

**Hiligaynon Version**

Instruksiyon Kung Paano Gamiton Ang MoCA

Ang Montreal Cognitive Assessment (MoCA) tool ay isa ka instrumento nga ginagamit para madasig nga mahibal-an kung ang isa ka sabdyek ay may cognitive dysfunction o wala. Ang ini nga instrumento ay ginagamit sa pagsukat sang mga cognitive domains sang isa ka sabdyek: visuospatial skills, pagsunod sa instruksyon, pag-manage sang mga buluhaton, memorya, atensyon, konsentrasyon, lenguahe, kag oryentasyon. Na-estimate nga 10 ka minutos ang kalawigon sang pag gamit sang MoCA. Ang pinakadako nga puntos nga pwede makuha sang isa ka sabdyek sa MoCA ay 30. Ang normal nga sabdyek ay makakakuha sang puntos nga 26 o mas mataas pa.

1. Pag-ubra Sang Trail

*Instruksyon sa Sabdyek*: “Sir/Maam, nakita mo ang mga bilog nga may numero o letra sa sulod? Kailangan mo maghimo sang kurit halin sa bilog nga may pinakanubo nga numero [*itudlo ang bilog nga may numero 1*] hasta sa bilog nga may pinakamataas nga letra [*itudlo ang bilog nga may letra E*]. Sa pagkurit mo, kinahanglan naga bulos-bulos ang numero kag letra, halin sa pinakamanubo hasta sa pinakamataas. Dapat tanan-tanan nga mga bilog maagyan sang imo nga kurit. Dapat wala gid bilog nga malaktawan ang imo kurit.”

*Instruksyon sa paghatag sang puntos*: Kung perpekto ang pagsunod sang sabdyek sa instruksyon, hatagan ang sabdyek sang isa ka puntos. Kailangan amo ini ang ma-agyan sang kurit: 1 – A – 2 – B – 3 – C – 4 – D – 5 – E. Dapat indi mag-ekis ang mga kurit. Kung magka-sala ang sabdyek sa pag-sunod sang instruksyon kag indi niya ini gin-tama, indi pag-hatagi sang puntos ang sabdyek sa parte nga ini.

2. Pag-Kopya Sang Drowing Nga Cube (Visuoconstructional Skills)

*Instruksyon sa Sabdyek*: “Sir/Maam, nakita mo ini nga drowing? Kopyahon mo lang ang drowing.”

*Instruksyon sa paghatag sang puntos*: Kung tama ang pag-kopya sang sabdyek sang drowing nga cube, hatagan ang sabdyek sang isa ka puntos. Importante gid nga ang drowing ay may tatlo ka dimensyon. Dapat kumpleto ang mga kurit, wala sang gin-dugang nga kurit, kag dapat tama ang haba kag oryentasyon sang mga kurit. Kung indi ma-sunod sang sabdyek ang tanan nga instruksyon, indi pag-hatagi sang puntos ang sabdyek sa parte nga ini.

3. Pag-drowing sang Orasan (Visualconstructional Skills)

*Instruksyon sa Sabdyek*: “Sir/Maam, magdrowing ka sang orasan o relo. Ang oras nga nakabutang sa orasan o relo ay: diyes ka minutos pagkaligad sang alas onse.”

*Instruksyon sa paghatag sang puntos*:

Kung tama (bilog) ang porma sang orasan nga gin-drowing sang sabdyek, hatagan ang sabdyek sang isa ka puntos. Pwede batunon ang bilog nga may gamay na distorsyon (e.g., may gamay nga sala sa pagka-sara sang bilog).

Kung tama ang pagkabutang sang mga numero sa orasan nga gin-drowing sang sabdyek, hatagan pagid sang isa ka puntos ang sabdyek. Kailangan nakabutang ang tanan nga mga numero kag wala sang gin-dugang nga numero. Dapat tama ang pagkasunod-sunod sang mga numero. Dapat tama ang pagka-pwesto sang mga numero. Pwede batunon ang Romano nga pagkasulat sang mga numero. Pwede man batunon ang drowing kung ang mga numero ay naka-pwesto sa gwa sang bilog.

Kung tama ang posisyon sang mga kamot sang orasan nga gin-drowing sang sabdyek, hatagan pagid sang isa ka puntos ang sabdyek. Importante gid nga ang kamot nga naga-tudlo sa numero 11 ay mas malip-ot kung ikumpara sa kamot nga naga-tudlo sa numero 2. Dapat ang mga kamot ay naga-halin sa pinaka-tunga sang bilog.

Ang pinakadako nga puntos nga pwede makuha sang sabdyek sa pag-drowing sang orasan nga ini ay 3.

4. Paghatag Pangalan

*Instruksyon sa Sabdyek:* “Sir/Maam, ano ang tawag sa mga sapat nga ini?” [isa-isa nga itudlo ang mga drowing, halin sa wa-la hasta sa to-o]

*Instruksyon sa paghatag sang puntos:* Hatagan ang sabdyek sang isa ka puntos kung tama ang paghatag niya sang pangalan sa sapat. Sa MoCA tool, may nakadrowing nga tatlo ka sapat nga dapat hatagan sang pangalan sang sabdyek (“leon”, “bukaw”, kag “kamelyo”), kag ang pinakadako nga puntos nga pwede makuha sang sabdyek sa parte nga ini ay 3.

5. Memorya

*Instruksyon sa Sabdyek:*

“Sir/Ma’am, may basahon ako nga lima ka mga salita. Pamati ka gid sang maayo kag tandaan mo ang mga basahon ko nga mga salita. Pagkatapos ko basahon ang mga salita, hambalon mo liwat ang mga salita nga ginbasa ko. Indi importante kung ano ang pagkasunod-sunod sang mga salita nga imo ihambal. Ang ini nga mga salita, dapat mo gid matandaan hasta karon.”

*Instruksyon sa paghatag sang puntos:*

Basahon mo ang lima ka salita nga nakabutang sa MoCA Tool. Pagkatapos mo basahon ang lima ka salita, kinahanglan ipahambal mo liwat sa sabdyek ang mga salita nga madumduman niya. Duwa ka beses mo ini himuon. Wala pa puntos nga ihatag sa sini nga parte.

Pagkatapos sang 5-minutos, kinahanglan ipahambal mo liwat ang mga salita sa sabdyek. Amo ini ang instruksyon nga ihatag sa sabdyek: “Sir/Maam, natandaan mo ang lima ka mga salita nga ginpa-tandaan ko sa imo kagina? Ihambal mo sila sa akon.”

Hatagan ang sabdyek sang isa ka puntos sa kada salita nga madumduman niya pagkatapos sang 5-minutos. Ang pinakadako nga puntos nga pwede makuha sang sabdyek sa parte nga ini ay 5.

*Opsyonal*:

Pwede hatagan sang mga palatandaan (“hint”) ang sabdyek kung indi niya madumduman ang mga salita. Pero, kung naghatag ka na sang palatandaan, wala na puntos nga ihatag sa sabdyek biskan madumduman pa niya ang salita. Ang puntos ginahatag lamang sa kada salita nga madumduman sang sabdyek nga wala ginbuligan sang mga palatandaan. Ang mga palatandaan ay ginagamit lamang para sa pagkuha sang impormasyon nga pwede gamiton para mahibal-an kung ano ang kalagayan sang paino-ino sang sabdyek.

Palatandaan 1:

Amo ini ang mga palatandaan nga pwede ihatag sa sabdyek:

GUYA: Parte ini sang katawan sang tawo.

ASUL: Kulay ini siya.

SIMBAHAN: Lugar ini siya.

ROSAS: Bulak ini siya.

SEDA: Tela ini siya.

Palatandaan 2:

Pagkatapos mo ihatag ang mga “Palatandaan 1” kag indi pagid madumduman sang sabdyek ang mga salita, hatagan mo pagid siya sang mga sari-sari nga pagpipilian:

a. Guya, Kamut, Ilong

b. Pula, Asul, Verde

c. Eskwelahan, Ospital, Simbahan

d. Rosas, Daisy, Gumamela

e. Cotton, Seda, Linen

6. Atensyon

Part 1:

*Instruksyon sa sabdyek:* “Sir/Maam, may basahon ako nga mga numero. Pamatian mo sang maayo kag hambalon mo liwat ang mga ginbasa ko nga mga numero. Kailangan nga tama gid ang pagkasunod-sunod sang mga numero.”

*Instruksyon sa paghatag sang puntos*: Kung perpekto ang pagsunod sang sabdyek sa instruksyon, hatagan ang sabdyek sang isa ka puntos. Mahalaga nga 2 – 1 – 8 – 5- 4 ang magiging sabat sang sabdyek.

Part 2:

*Instruksyon sa sabdyek:* “Sir/Maam, may basahon ako nga mga numero. Pamatian mo. Basahon ko ang mga numero nga pa-abante. Ang himuon mo, hambalon mo liwat ang mga numero nga binasa ko, pero pa-atras. Kung pa-abante ang pagbasa ko, pa-atras ang pag-ilog mo.”

*Instruksyon sa paghatag sang puntos*: Kung perpekto ang pagsunod sang sabdyek sa instruksyon, hatagan ang sabdyek sang isa ka puntos. Mahalaga nga 2 – 4 – 7 ang magiging sabat sang sabdyek.

Part 3:

*Instruksyon sa sabdyek:* “Sir/Maam, mabasa ako sang mga letra. Pamati ka sang maayo. Kung mabatian mo ang letra nga A, dapat i-tap mo ang imo kamot sa la mesa.”

*Instruksyon sa paghatag sang puntos*: Importante gid nga mag-tap ang sabdyek kung magbasa ka sang letra A. Indi dapat siya mag-tap kung indi letra A ang letra nga imo ginabasa. Wala ihatag nga puntos kung ≥ 2 ka letra siya nagka-sala sa pag-tap.

Part 4:

*Instruksyon sa sabdyek:* “Sir/Maam, kailangan mo mag-calcular. Ang himuon mo, ang 100 ibanan mo sang 7. Pagkatapos sina, ang sabat nga makuha mo ibanan mo pagid sang 7. Pagkatapos sina, ang sabat nga makuha mo ibanan mo pagid sang 7. Halin sa 100, kinahanglan 5 ka beses ka mag-iban sang 7 nga sunod-sunod.”

*Instruksyon sa paghatag sang puntos*:

Lima ka beses nga mag-calcular ang sabdyek sa parte nga ini. Obserbahan mo ang kada kalkulasyon.

Kung magka-sala ang sabdyek sa isa ka kalkulasyon pero tama ang iya nga pag-calcular sa mga naga-sunod nga mga kalkulasyon, pwede gihapon batunon ang mga naga-sunod nga mga tama nga mga kalkulasyon. Halimbawa: Kung ang sabat sang sabdyek ay “100, 92, 85, 78, 71, 64”, indi pag-batunon ang isa ka sala nga kalkulasyon (100-7 = “92”), pero pwede gihapon batunon ang mga naga-sunod nga mga tama nga mga kalkulasyon (92-7 = “85”, 85-7 = “78”, 78-7= “71”, 71-7 = “64”).

4 ukon 5 nga tama nga sabat: 3 pts

2 ukon 3 nga tama nga sabat: 2 pts

1 nga tama nga sabat: 1 pt

0 nga tama nga sabat: 0 pt

Ang pinakadako nga puntos nga pwede makuha sang sabdyek sa parte nga ini ay 3.

7. Lenguahe

Part 1:

*Instruksyon sa sabdyek:* “Sir/Maam, may basahon ako. Ang himuon mo, kailangan mo pamatian ang basahon ko kag imo nga hambalon liwat kung ano ang ginbasa ko.”

*Instruksyon sa paghatag sang puntos*: Kung perpekto ang pag-ilog sang sabdyek sa ginbasa mo, hatagan ang sabdyek sang 1 ka puntos. Maging alerto sa pagpamati sa pag-ilog sang sabdyek sang imo ginbasa. Importante gid nga wala sang sobra o kulang nga mga salita o letra sa pag-ilog sang sabdyek sang imo ginbasa. Sa MoCA tool, may duwa ka mga balasahon nga dapat ipahambal liwat sa sabdyek. Sa parte nga ini, ang pinakadako nga puntos nga pwede makuha sang sabdyek ay 2.

Part 2:

*Instruksyon sa sabdyek:* “Sir/Maam, sa isa ka minuto, hatagan mo ako sang mga salita nga naga umpisa sa letra B.”

*Instruksyon sa paghatag sang puntos:* Kung nakahatag ang sabdyek sang ≥ 11 nga mga salita sa sulod sang 1 minuto, hatagan siya sang 1 ka puntos.

8. Abstraksyon

*Instruksyon sa sabdyek:* “Sir/Maam, mabasa ako sang duwa ka salita. Ang duwa ka salita nga hambalon ko, may pagkapareho ini sila. Ang himuon mo, ihambal mo sa akon kung ano ang pagkapareho sang mga salita nga hambalon ko. Halimbawa: Ano ang pagka-pareho sang saging kag aranghita?”

Dapat “Prutas” ang magiging sabat sang sabdyek. Kung indi “prutas” ang sabat sang sabdyek, ihambal sa iya nga “ang saging kag aranghita, pareho nga prutas”. Indi na maghatag sang iban pa nga instruksyon sa sabdyek. Pero kung tama (“prutas”) ang sabat sang sabdyek sa parte nga ini, wala pa puntos nga ihatag dahil ang parte nga ini (Saging kag Aranghita) ay halimbawa lamang.

May puntos nga ihatag sa sabdyek kung tama ang iya sabat sa mga pares nga ini: Tren kag Bisikleta (1 ka puntos), Relo kag Ruler (1 ka puntos).

*Instruksyon sa paghatag sang puntos*:

Hatagan ang sabdyek sang 1 ka puntos sa kada tama nga sabat.

Pwede batunon ang mga sabat nga ini:

a. Tren kag Bisekleta = mga salakyan, mga pangbiyahe, puwede ka magbiyahe sa duha

b. Ruler kag Relo = mga instrumentong pangtakus, ginausar pangtakus.

Indi pagbatunon ang mga sabat nga ini:

a. Tren kag Bisekleta = may mga ruweda

b. Ruler kag Relo = may mga numero

Sa parte nga ini, ang pinakadako nga puntos nga pwede makuha sang sabdyek ay 2.

9. Oryentasyon

*Instruksyon sa sabdyek:*

“Sir/Maam, ano ang petsa, bulan, kag tuig subong? Ano nga adlaw subong? Ano tawag mo sa lugar diri? Ano tawag mo sa siyudad diri?”

*Instruksyon sa paghatag sang puntos*:

Hatagan ang sabdyek sang 1 ka puntos sa kada tama nga sabat. Sa parte nga ini, ang pinakadako nga puntos nga pwede makuha sang sabdyek ay 6.

**KABILUGAN:** Ang pinakadako nga puntos nga pwede makuha sang isa ka sabdyek sa MoCA ay 30. Ang normal nga sabdyek ay makakakuha sang puntos nga 26 o mas mataas pa.
